# Supplementary material for: A halofuginone electrochemical sensor based on a molecularly imprinted polypyrrole coated glassy carbon electrode
Source: Royal Society of Chemistry journal article supplement (doi:10.1039/c5ay01368b), 2015-01-01
Supplement: c5ay01368b1.pdf [file c5ay01368b1.pdf]

## Supporting Information

### Halofuginone electrochemical sensor based on molecularly imprinted polypyrrole coated glassy carbon electrode

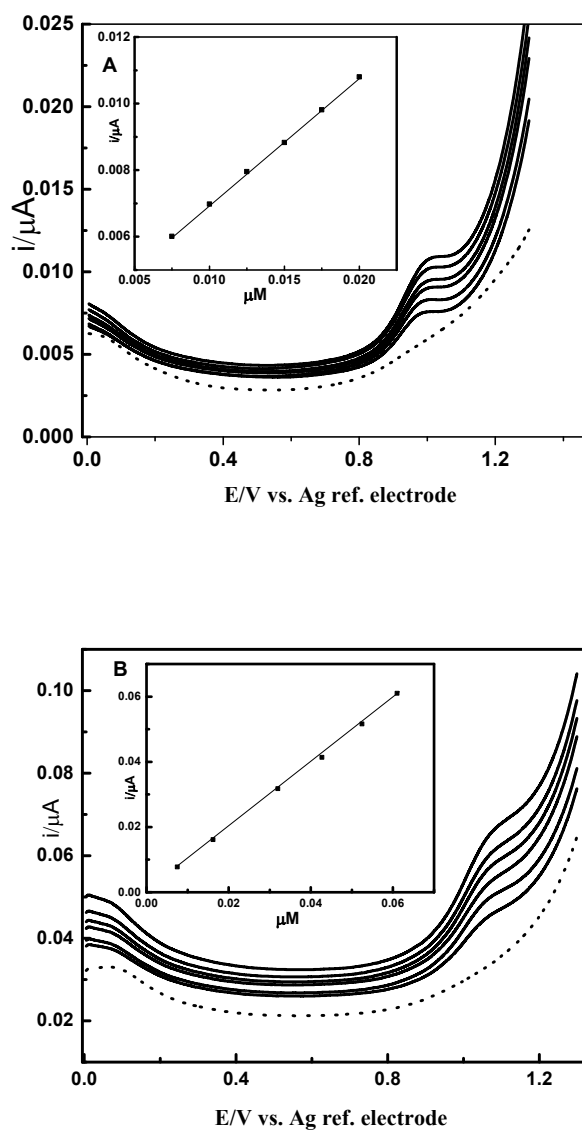

Figure S1. (A) DPVs and (B) SWVs for the determination of HFG in 0.2 M phosphate buffer solution of pH 7.0 at MIP; the dotted lines (...) represent the blank; insets: calibration curves of HFG. DPV conditions: Step potential 6 mV, modulation amplitude 50 mV and scan rate 20 mV/s; SWV conditions: frequency ( $f$ ) of 50 Hz, amplitude ( $a$ ) of 50 mV, and scan increment (DEs) of 4 mV.
